# Supplementary material
Source: Springer Nature journal article supplement (https://www.springermedizin.de/resource/supplementary/12905_2011_283_MOESM2_ESM.pdf/9518362)

0% 20% 40% 60% 80% 100%

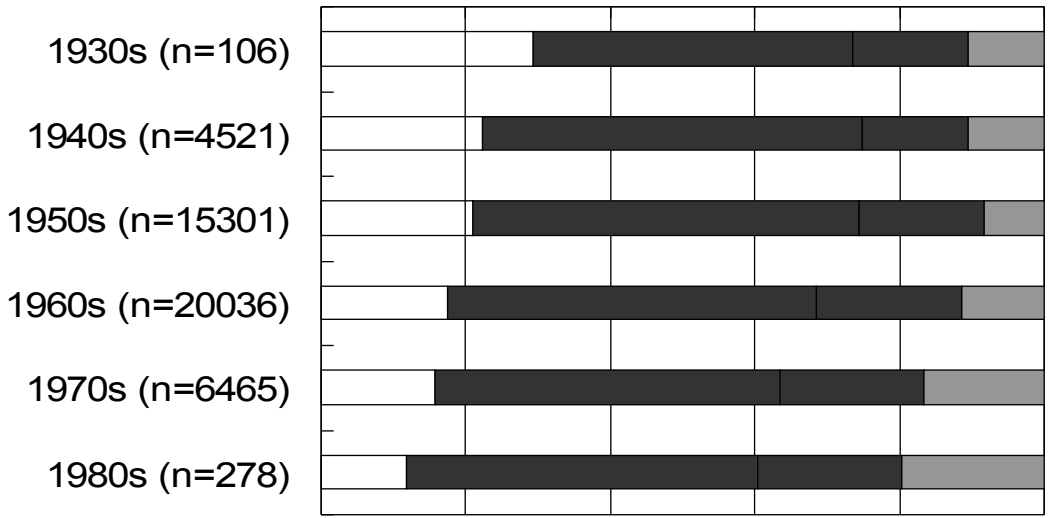

■ <1 year   ■ 1-4 years   ■ ≥5 years   ■ Never

Supplement: MOESM2 [file 9518362]
